# Supplementary material
Source: ML conference proceedings conference paper supplement (https://proceedings.neurips.cc/paper_files/paper/2010/hash/adc8ca1b15e20915c3ea6008fc2f52ed-Abstract.html)
Supplement: Supplementary file 1 [file adc8ca1b15e20915c3ea6008fc2f52ed-Supplemental.zip]

---

# MAP estimation in Binary MRFs via Bipartite Multi-cuts (Supplementary Material)

---

|                          |                         |                            |
|--------------------------|-------------------------|----------------------------|
| <b>Sashank J. Reddi*</b> | <b>Sunita Sarawagi†</b> | <b>Sundar Vishwanathan</b> |
| IIT Bombay               | IIT Bombay              | IIT Bombay                 |
| sashank@cse.iitb.ac.in   | sunita@cse.iitb.ac.in   | sundar@cse.iitb.ac.in      |

## 1 Optimized Graph Construction

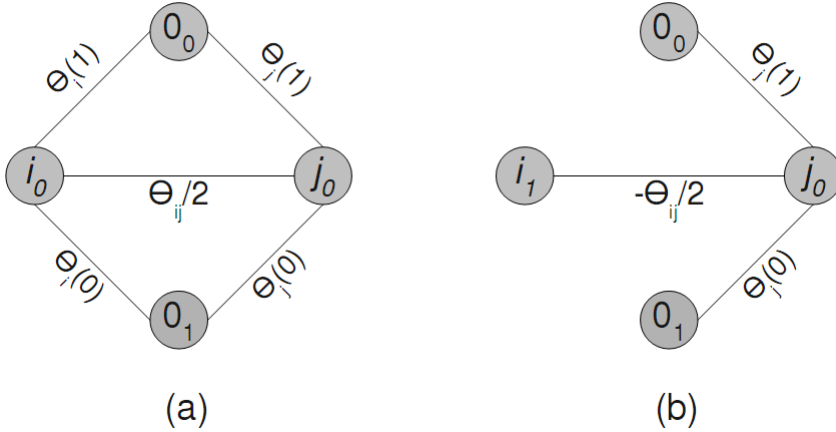

Figure 1: (a) The graph construction for submodular edges. (b) The graph construction for non-submodular edges. Here  $\theta_{ij} = \theta_{ij}(0, 1) + \theta_{ij}(1, 0) - \theta_{ij}(0, 0) - \theta_{ij}(1, 1)$ . If the edge is submodular,  $\theta_{ij}$  is non-negative. We have also assumed  $\Theta \geq 0$ . Hence all the edges in this part of the graph have non-negative edge weights.

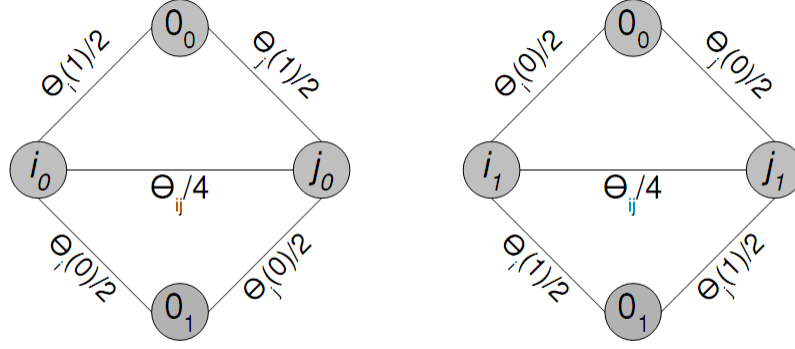

(a) Submodular edges

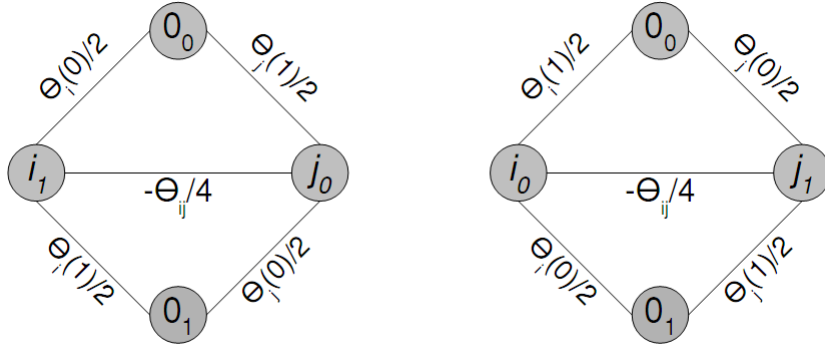

(b) Non-Submodular edges

Figure 2: (a) Symmetric graph construction. Here  $\theta_{ij} = \theta_{ij}(0, 1) + \theta_{ij}(1, 0) - \theta_{ij}(0, 0) - \theta_{ij}(1, 1)$ . We have also assumed  $\Theta \geq 0$ .

## 2 Symmetric Graph Construction

## 3 Relationship with Cycle Inequalities

**Theorem 1.** Suppose we construct our symmetric minimum cut graph  $H$  with all possible edges  $(i_s, j_t) \forall s, t \in \{0, 1\}$  for every edge  $(i, j) \in \mathcal{E}$ , instead of two that we currently get due to zero-normalized edge potentials. Then, BMC-Sym LP along with the constraints  $d_{i_s j_t} + d_{i_s j_{\bar{t}}} = 1 \forall (i_s, j_t) \in \mathcal{E}_H$  is equivalent to cycle inequality LP.

\*The author is currently affiliated with Google Inc.

†The author acknowledges the generous support of Microsoft Research and IBM's Faculty award.

*Proof.* Consider a cycle  $C \in \mathcal{C}$  in  $S$ . Suppose  $F \subseteq C$  such that  $|F|$  is odd. We will show that the constraints  $\sum_{e \in F} (1 - d_e) + \sum_{e \in C \setminus F} d_e \geq 1$  in the cycle inequality LP is equivalent to constraints  $\sum_e d'_e \geq 1$  in BMC-Sym LP for set of paths  $\mathcal{P}_{(C,F)}$ , which we will now define. Consider the following procedure to obtain  $\mathcal{P}_{(C,F)} \subseteq \mathcal{P}$ . Recall  $\mathcal{P}$  is the set of all paths between  $ST$  pairs in  $H$ . Suppose we start with node  $i_0^1$  in  $C$  and move along the cycle  $C$  i.e  $C$  is  $i_0^1 - i_0^2 - \dots - i_0^{|C|} - i_0^1$ . Now, consider the path  $P: i_{s_1}^1 - i_{s_2}^2 - \dots - i_{s_{|C|}}^{|C|} - i_{s_{|C|+1}}^1$  in  $H$ . Here,  $s_l \in \{0, 1\}$  and  $s_l \neq s_{l+1}$  iff  $(i_0^l, i_0^{l+1}) \in F$ . It is not hard to see that  $s_1 \neq s_{|C|+1}$  since  $|F|$  is odd. Therefore, the considered path  $P \in \mathcal{P}$ . Applying the same procedure with different starting nodes leads to different paths in  $H$ . We denote the set of all such paths as  $\mathcal{P}_{(C,F)}$ . Here,  $\sum_{e \in F} (1 - d_e) + \sum_{e \in C \setminus F} d_e \geq 1$  is equivalent to  $\sum_{e \in P} d'_e \geq 1$ , where  $P \in \mathcal{P}_{(C,F)}$ , since  $d'_e = d_e$  and  $d'_{i_s j_t} + d'_{i_s j_{\bar{t}}} = 1 \forall (i_s, j_t) \in \mathcal{E}_H$ . This equivalence shows that every cycle constraint corresponds to a set of equivalent path constraints in BMC-Sym LP and vice-versa. It is easy to see that the two LPs have the same objective value. Hence, two LPs are equivalent.  $\square$
